# Supplementary material for: A workflow for low-cost automated image analysis of myxomycete spore numbers, size and shape
Source: PeerJ journal article supplement (doi:10.7717/peerj.12471), 2021-11-16

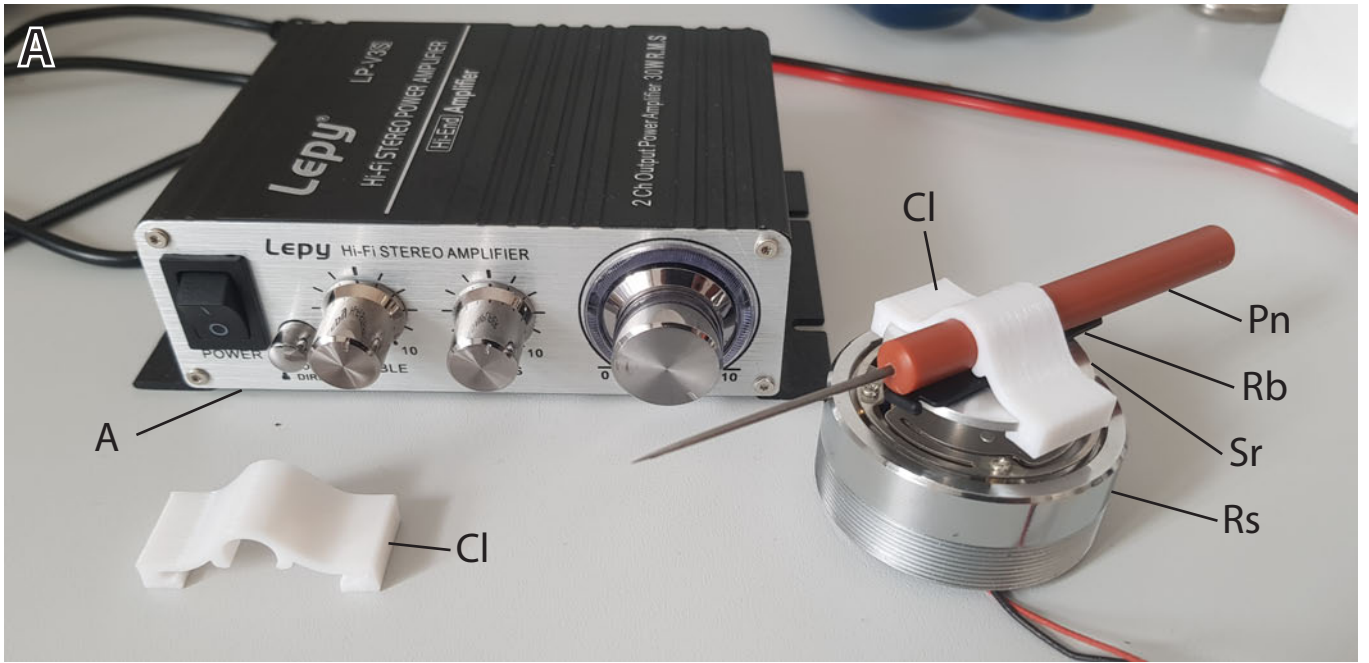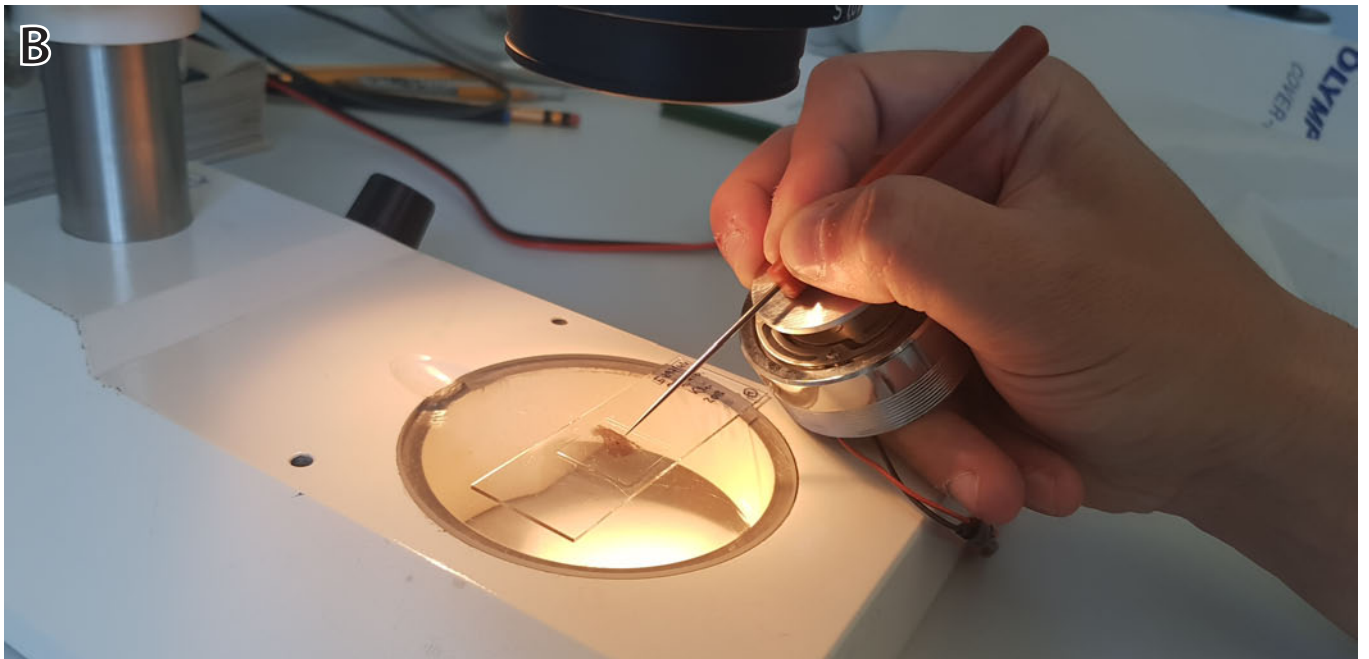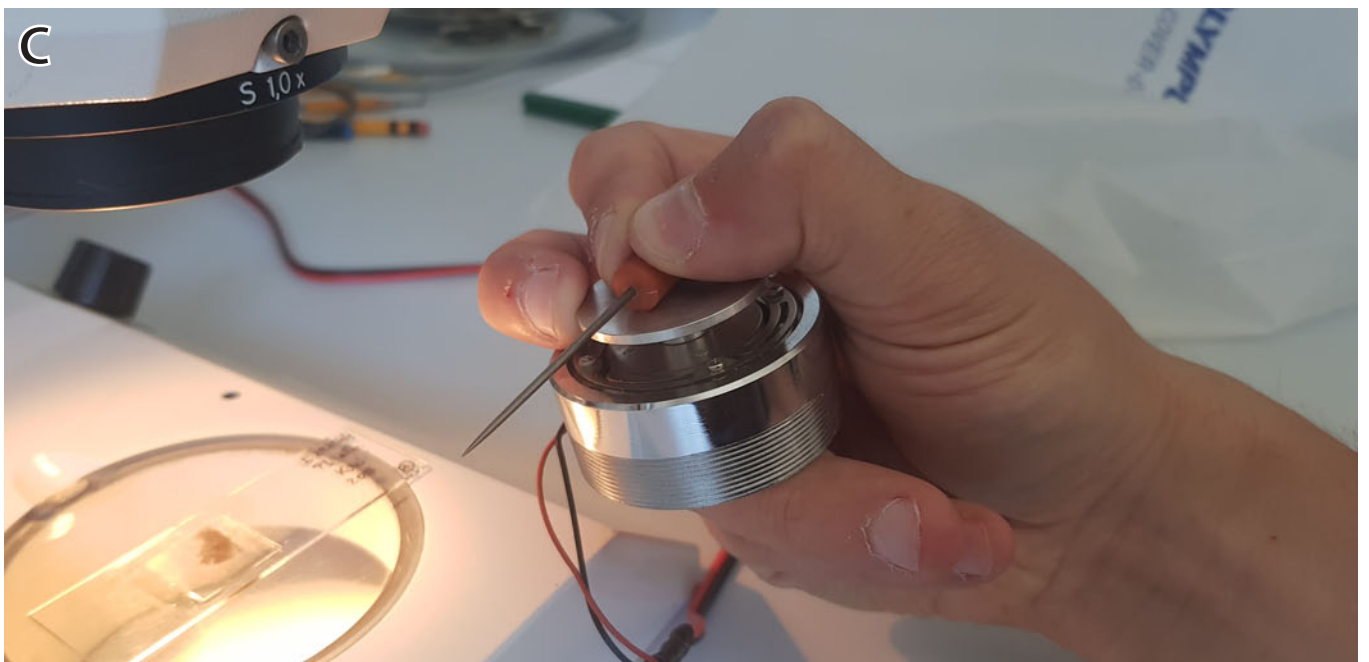

Supplement: Supplement_3_2_20210718.pdf [file Supplement_3_2_20210718.pdf]
